# Supplementary material
Source: PubMed Central journal article supplement (PMC3401903)
Supplement: mmi0084-1150-SD1.pdf [file mmi0084-1150-SD1.pdf]

**Supplementary Table S1: CAZome genes that are upregulated in the *tef1:lae1* strain**

| protein ID | Identification                                      | QM 9414             | S.D.                | <i>tef1:lae1</i>    | S.D.                | <i>tef1:lae1</i> | p-value   |
|------------|-----------------------------------------------------|---------------------|---------------------|---------------------|---------------------|------------------|-----------|
|            |                                                     | [log <sub>2</sub> ] | [log <sub>2</sub> ] | [log <sub>2</sub> ] | [log <sub>2</sub> ] | (-fold)          |           |
| 3094       | GH30 $\beta$ -1,6-glucanase                         | 5.59588             | 0.12234             | 7.17447             | 0.6662              | 2.986 up         | 0.0223    |
| 5836       | GH2 $\beta$ -mannosidase                            | 10.7385             | 0.03373             | 11.79068            | 0.42011             | 2.073 up         | 0.0321    |
| 22129      | GH61 cellulose monooxygenase CEL61B                 | 10.91782            | 0.01727             | 12.59391            | 0.67915             | 3.195 up         | 0.041     |
| 27219      | GH27 $\alpha$ -galactosidase                        | 3.81507             | 0.46426             | 5.24526             | 0.10711             | 2.694 up         | 0.00533   |
| 41768      | GH16 glycoside hydrolase                            | 6.04602             | 0.26971             | 7.87103             | 0.65437             | 3.543 up         | 0.025     |
| 46816      | GH3 $\beta$ -glucosidase                            | 8.70765             | 0.07007             | 10.40969            | 0.23061             | 3.253 up         | 0.000655  |
| 47268      | GH3 $\beta$ -glucosidase.                           | 11.20929            | 0.0589              | 12.75641            | 0.28754             | 2.922 up         | 0.00411   |
| 49193      | GH17 $\beta$ -glycosidase                           | 12.94412            | 0.03577             | 13.9912             | 0.33158             | 2.066 up         | 0.0214    |
| 49976      | GH45 endoglucanase CEL45=EGL5                       | 8.40415             | 0.20013             | 13.33607            | 0.38552             | 30.525 up        | 0.000107  |
| 50215      | GH16 $\beta$ -glycosidase, one transmembrane domain | 11.3347             | 0.1033              | 12.58219            | 0.2964              | 2.374 up         | 0.000381  |
| 55802      | GH76 $\alpha$ -1,6-mannanase                        | 8.68349             | 0.01567             | 11.45617            | 0.65402             | 6.833 up         | 0.00589   |
| 55999      | GH27 $\alpha$ -galactosidase                        | 8.14024             | 0.03952             | 9.36371             | 0.24875             | 2.335 up         | 0.000868  |
| 56448      | GH18 endochitinase CHI18-11                         | 6.8206              | 0.09009             | 8.23413             | 0.10536             | 2.663 up         | 0.0000997 |
| 56894      | GH18 endochitinase CHI18-10                         | 2.87534             | 0.22714             | 4.25771             | 0.10343             | 2.606 up         | 0.00122   |
| 57179      | GH88 glycosyl hydrolase                             | 5.09815             | 0.27384             | 8.17708             | 0.56865             | 8.449 up         | 0.00268   |
| 58450      | GH3 $\beta$ -xylosidase.                            | 4.41688             | 0.14502             | 5.64895             | 0.31322             | 2.349 up         | 0.0129    |
| 58887      | GH78 $\alpha$ -L-rhamnosidases                      | 3.37525             | 0.1207              | 4.86028             | 0.11271             | 2.799 up         | 0.00046   |
| 59791      | GH18 endochitinase CHI18-15                         | 2.71721             | 0.04635             | 5.03302             | 0.41795             | 4.978 up         | 0.00233   |
| 60635      | GH92 $\alpha$ -1,2-mannosidase                      | 5.36203             | 0.26278             | 10.04624            | 1.90555             | 25.709 up        | 0.0186    |
| 65162      | GH18 endochitinase CHI18-1b                         | 10.93982            | 0.18638             | 13.36774            | 0.14046             | 5.381 up         | 0.000338  |
| 65380      | 1, 2- $\alpha$ -mannosidase                         | 10.51249            | 0.12254             | 11.92898            | 0.25541             | 2.669 up         | 0.00339   |
| 69276      | GH30 $\beta$ -glycoside hydrolase                   | 7.51479             | 0.17067             | 11.80902            | 0.71743             | 19.619 up        | 0.000992  |
| 70186      | GH28 polygalacturonase                              | 5.05832             | 0.23144             | 6.71626             | 0.48761             | 3.155 up         | 0.00759   |
| 70845      | GH55 $\beta$ -1,3-glucanase                         | 9.03833             | 0.11074             | 11.58816            | 0.16389             | 5.855 up         | 0.00032   |
| 71245      | GH18 endochitinase CHI18-1a                         | 4.31858             | 0.19861             | 5.50133             | 0.43093             | 2.270 up         | 0.0356    |
| 71554      | GH5 $\beta$ -glycosidase                            | 3.70787             | 0.25126             | 5.34567             | 0.12291             | 3.111 up         | 0.000665  |
| 72071      | CBM13 Carbohydrate-Binding Module Family 13         | 5.70232             | 0.3653              | 7.48403             | 0.61624             | 3.438 up         | 0.0249    |

|        |                                                                             |          |         |          |         |           |           |
|--------|-----------------------------------------------------------------------------|----------|---------|----------|---------|-----------|-----------|
| 72567  | GH6 cellobiohydrolase CEL6A=CBH2                                            | 12.99037 | 0.15137 | 15.25272 | 0.15465 | 4.797 up  | 0.0000595 |
| 73005  | GH79 $\beta$ -glycosidases                                                  | 2.6602   | 0.01767 | 4.49246  | 0.09096 | 3.560 up  | 0.0000908 |
| 73101  | GH16 $\beta$ -glycosidase                                                   | 4.8095   | 0.11944 | 6.29322  | 0.1155  | 2.796 up  | 0.000564  |
| 73179  | GH95 $\alpha$ -fucosidase                                                   | 6.98958  | 0.06552 | 8.78224  | 0.42735 | 3.464 up  | 0.00832   |
| 73632  | CE5 acetylxylan esterase AXE1                                               | 7.18943  | 0.14111 | 11.0991  | 0.28218 | 15.028 up | 0.0000973 |
| 73638  | CIP1                                                                        | 9.0132   | 0.17398 | 13.63062 | 0.37794 | 24.546 up | 0.000107  |
| 73643  | GH61 cellulose monooxygenase CEL61A                                         | 7.80786  | 0.10156 | 12.32581 | 0.15622 | 22.910 up | 0.0000299 |
| 76210  | GH62, abf2, a-L-arabinofuranosidase                                         | 7.01599  | 0.1865  | 10.47392 | 1.48912 | 10.988 up | 0.00526   |
| 76672  | $\beta$ -glucosidase 1 (EC 3.2.1.21)                                        | 7.04683  | 0.1593  | 11.84275 | 1.68676 | 27.778 up | 0.0151    |
| 77299  | GH2 exo- $\beta$ -D-glucosaminidase                                         | 8.93389  | 0.19956 | 10.1115  | 0.50636 | 2.262 up  | 0.00312   |
| 80340  | GT32 $\alpha$ -mannosyltransferase                                          | 9.93872  | 0.1123  | 12.59314 | 0.15565 | 6.295 up  | 0.000242  |
| 81087  | GH5 glycoside hydrolase                                                     | 10.24147 | 0.0941  | 11.84336 | 0.55476 | 3.035 up  | 0.000925  |
| 82235  | GH31 $\alpha$ -glucosidase B                                                | 12.75967 | 0.10122 | 14.26778 | 0.17921 | 2.844 up  | 0.00103   |
| 103049 | GH28 polygalacturonase                                                      | 5.31208  | 0.23593 | 6.61591  | 0.24359 | 2.468 up  | 0.00177   |
| 105448 | CBM13 carbohydrate-binding protein                                          | 3.29043  | 0.21797 | 5.79799  | 0.39703 | 5.686 up  | 0.00229   |
| 108346 | GH18 endochitinase CHI18-8                                                  | 3.45563  | 0.07839 | 5.28355  | 0.25648 | 3.550 up  | 0.00141   |
| 108776 | GH55 $\beta$ -1,3-glucanase                                                 | 5.42228  | 0.13961 | 6.7659   | 0.23256 | 2.537 up  | 0.00257   |
| 109278 | GH24 related to phage lysozymes                                             | 7.0068   | 0.14823 | 9.85215  | 0.82357 | 7.186 up  | 0.0163    |
| 110259 | PL7 alginate lyase like protein                                             | 3.42471  | 0.11824 | 4.77698  | 0.11552 | 2.553 up  | 0.000728  |
| 110317 | GH18 endochitinase CH18-17                                                  | 3.11463  | 0.09064 | 4.81687  | 0.11685 | 3.254 up  | 0.000242  |
| 110848 | protein with GH23 modules, glycoside hydrolase not yet assigned to a family | 3.31933  | 0.16332 | 5.57066  | 0.5235  | 4.761 up  | 0.00532   |
| 110894 | GH5 $\beta$ -1,4-endogalactanase                                            | 7.00883  | 0.12059 | 9.29206  | 0.9065  | 4.867 up  | 0.0145    |
| 111733 | GH92 $\alpha$ -1,2-mannosidase                                              | 3.39345  | 0.32359 | 4.95686  | 0.10151 | 2.955 up  | 0.00107   |
| 111849 | GH30 endo- $\beta$ -1,4-xylanase XYN4                                       | 9.07927  | 0.02793 | 10.11854 | 0.07768 | 2.055 up  | 0.000186  |
| 112140 | GH28 polygalacturonase                                                      | 4.07985  | 0.32754 | 8.3271   | 0.38039 | 18.991 up | 0.00042   |
| 112392 | GH11 candidate xylanase (XYL5)                                              | 4.89618  | 0.07513 | 6.92671  | 0.36806 | 4.085 up  | 0.00259   |
| 120229 | GH10 xylanase XYN3                                                          | 7.1759   | 0.11749 | 13.2519  | 0.8036  | 67.461 up | 0.000643  |
| 120312 | GH5 endoglucanase Cel5A                                                     | 10.85671 | 0.20952 | 14.80739 | 0.26443 | 15.462 up | 0.0000716 |
| 120749 | GH1 CEL1A $\beta$ -glucosidase                                              | 13.19302 | 0.01401 | 14.50099 | 0.0573  | 2.475 up  | 0.000048  |

|        |                                           |          |         |          |         |           |           |
|--------|-------------------------------------------|----------|---------|----------|---------|-----------|-----------|
| 120873 | GH71 $\alpha$ -1,3-glucanase, 2 CBM       | 4.82384  | 0.29231 | 8.28327  | 0.26109 | 11.000 up | 0.000374  |
| 120961 | GH61 endoglucanase CEL61B                 | 8.6541   | 0.09645 | 13.06312 | 0.69301 | 21.244 up | 0.000327  |
| 121127 | GH3 BXL1 $\beta$ -xylosidase              | 10.11473 | 0.01254 | 12.3645  | 0.46332 | 4.756 up  | 0.000377  |
| 121746 | GH55 exo- $\beta$ -1,3-glucosidase GLUC78 | 10.82838 | 0.07343 | 12.79041 | 0.48476 | 3.896 up  | 0.0105    |
| 122081 | GH7 endoglucanase CEL7B=EGL1              | 8.68794  | 0.2276  | 13.75508 | 0.40052 | 33.524 up | 0.000204  |
| 122780 | GH28 polygalacturonase                    | 11.30576 | 0.03609 | 13.91132 | 0.27322 | 6.086 up  | 0.000798  |
| 123232 | GH12 endoglucanase Cel12A                 | 10.75466 | 0.19955 | 14.31326 | 0.26129 | 11.782 up | 0.0000743 |
| 123639 | GH64 $\beta$ -1,3-glucanase               | 3.67615  | 0.23266 | 5.06862  | 0.24667 | 2.625 up  | 0.00331   |
| 123818 | GH11 xylanase XYN2                        | 11.69446 | 0.06929 | 13.01123 | 0.60738 | 2.491 up  | 0.000747  |
| 123940 | methyl-glucuronoyl esterase CIP2          | 4.83643  | 0.37262 | 10.17903 | 1.68645 | 40.577 up | 0.00715   |
| 123989 | GH7, cellobiohydrolase Cel7A=CBH1         | 14.27507 | 0.04409 | 15.58843 | 0.08791 | 2.485 up  | 0.0000494 |
| 123992 | swollenin                                 | 11.22247 | 0.1043  | 13.13211 | 0.65201 | 3.757 up  | 0.00312   |
| 124043 | GH18 endochitinase CHI18-14               | 3.51068  | 0.38967 | 6.63093  | 0.22616 | 8.695 up  | 0.000612  |

---

The table shows the expression levels (in  $\log_2$ ) of the lae1OE strain CPK4086 and QM 9414. “fold” indicates the enhancement in strain CPK4086;

**Supplementary Table S2. Genes that are >2-fold downregulated in delta-*lae1* and >2-fold-upregulated during conidiation\***

| <b>Protein ID</b> | <b>Annotation</b>                                                   |
|-------------------|---------------------------------------------------------------------|
| 70800             | elastinolytic metalloproteinase                                     |
| 66551             | AAA ATPase                                                          |
| 46128             | AAA+-type ATPase                                                    |
| 69956             | Alcohol dehydrogenase, class V                                      |
| 80659             | alcohol oxidase AOX1                                                |
| 57940             | alternative oxidase aox1                                            |
| 5970              | Amidase                                                             |
| 69863             | Amidases                                                            |
| 67806             | Amino acid transporter                                              |
| 64971             | Amino acid transporters                                             |
| 81420             | Argonaute siRNA chaperone (ARC) complex subunit                     |
| 70803             | bifunctional catalase/oxidase                                       |
| 59151             | BYS1 domain protein                                                 |
| 119826            | C2H2 and homeobox transcription factor                              |
| 112538            | C2H2 transcription factor                                           |
| 111567            | C2H2 transcription factor                                           |
| 120597            | C2H2 transcriptional regulator (Egr2 ?)                             |
| 4171              | Ca <sup>2+</sup> transporter                                        |
| 2316              | calcosin related protein                                            |
| 64370             | calpain-like protease                                               |
| 67538             | Catalase                                                            |
| 120371            | Catalase                                                            |
| 54219             | CE acetyl xylan esterase                                            |
| 73632             | CE acetyl xylan esterase AXE1                                       |
| 123659            | cell wall protein. Distantly related to <i>S. cerevisiae</i> Pir3p. |
| 73638             | CIP1                                                                |
| 67964             | Cytochrome P450 CYP2 subfamily                                      |

64900 Cytochrome P450 CYP3/CYP5/CYP6/CYP9 subfamilies  
59377 Cytochrome P450 CYP3/CYP5/CYP6/CYP9 subfamilies  
66534 Cytochrome P450 CYP3/CYP5/CYP6/CYP9 subfamilies  
75713 Cytochrome P450 CYP4/CYP19/CYP26 subfamilies  
38749 Cytochrome P450 CYP4/CYP19/CYP26 subfamilies  
52489 cytosin/purin permease  
123946 dehydrogenase associated with cellulase signal transduction (PMID: 15288024)  
70961 dienelactone hydrolase  
65883 D-isomer-specific 2-hydroxy acid dehydrogenase  
61553 D-xylulose 5-phosphate/D-fructose 6-phosphate phosphoketolase  
82662 Epl1  
61078 esterase/ lipase  
106697 esterase/lipase, HGT  
105823 FAD binding domain protein  
66726 FAD binding protein  
4114 FAD linked oxidase  
104211 FKBP-type peptidyl-prolyl cis-trans isomerase  
111716 Flavonol reductase/cinnamoyl-CoA reductase  
111881 flavoprotein monooxygenases  
72922 GABA permease, 12 TM  
104222 GCN5-related acetyltransferase  
112665 GCN5-related N-acetyltransferase  
121418 G-D-S-L lipase/acylase  
56840 GFO\_IDH\_MocA dehydrogenase  
120749 GH1 CEL1A  $\beta$ -glucosidase  
120229 GH10 xylanase XYN3  
123818 GH11 xylanase XYN2  
123940 GH115 glucuronoyl esterase CIP2  
123232 GH12 endoglucanase Cel12A  
65333 GH15 candidate a-glycosidase ( trehalase ?)

|        |                                                       |
|--------|-------------------------------------------------------|
| 69245  | GH2 $\beta$ -mannosidase                              |
| 72632  | GH27- $\alpha$ -galactosidase                         |
| 103049 | GH28: candidate polygalacturonase                     |
| 121127 | GH3 $\beta$ -xylosidase BXL1                          |
| 69276  | GH30 glucuronoxylan hydrolase                         |
| 69944  | GH31 $\alpha$ -glucosidase                            |
| 4561   | GH32, candidate $\alpha$ -glycosyltransferase         |
| 123226 | GH37 trehalase                                        |
| 120312 | GH5 endoglucanase Cel5A                               |
| 81087  | GH5 glycoside hydrolase                               |
| 72567  | GH6 cellobiohydrolase CEL6A                           |
| 73643  | GH61 cellulase activating protein CEL61A              |
| 120961 | GH61 cellulase activating protein CEL61B              |
| 76210  | GH62, abf2, $\alpha$ -L-arabinofuranosidase           |
| 72526  | GH67 $\alpha$ -glucuronidase                          |
| 122081 | GH7 CEL7B endoglucanase 1                             |
| 123989 | GH7 cellobiohydrolase Cel7A                           |
| 49081  | GH74 xyloglucan hydrolase                             |
| 71394  | GH79 related to $\beta$ -glycosidases                 |
| 74198  | GH92 $\alpha$ -1,2-mannosidase                        |
| 5807   | GH95 $\alpha$ -fucosidase                             |
| 112022 | glutathione-S-transferase                             |
| 44366  | Glycosylphosphatidylinositol-specific phospholipase C |
| 72259  | GPCR, RgsA-type                                       |
| 77547  | GT1 glycosyltransferase                               |
| 63756  | helicase, DEAD-box superfamily                        |
| 103189 | HET protein                                           |
| 106171 | HET protein                                           |
| 80142  | HSP104 and related ATP-dependent Clp proteases        |
| 122363 | Hsp26/Hsp42                                           |

|        |                                                          |
|--------|----------------------------------------------------------|
| 46285  | Hsp26/Hsp42                                              |
| 62100  | Hsp30                                                    |
| 55362  | HSP70/HSC70, HSP70 superfamily                           |
| 54352  | hypothetical protein                                     |
| 123468 | IMP dehydrogenase                                        |
| 76034  | Iron/ascorbate family oxidoreductases                    |
| 105968 | Iron/ascorbate family oxidoreductases                    |
| 105342 | Iron/ascorbate family oxidoreductases                    |
| 5182   | iron-dependent peroxidase                                |
| 77423  | Jacalin-like lectin                                      |
| 105518 | K <sup>+</sup> channel                                   |
| 122820 | Kynurenine aminotransferase, glutamine transaminase K    |
| 44175  | lactate pyruvate transporter                             |
| 55240  | large-conductance mechanosensitive channel               |
| 104599 | Mandelate racemase/muconate lactonizing enzyme           |
| 74194  | mannitol dehydrogenase LXR1                              |
| 58701  | Mannose-6-phosphate isomerase                            |
| 75165  | MSF transporter                                          |
| 54972  | MSF transporter                                          |
| 44956  | MSF transporter                                          |
| 54036  | MSF transporter                                          |
| 69957  | MSF transporter                                          |
| 70933  | MSF transporter                                          |
| 78585  | MSF transporter                                          |
| 3405   | MSF transporter                                          |
| 26642  | MSF transporter                                          |
| 57749  | MSF transporter                                          |
| 62380  | MSF transporter (galactose permease?)                    |
| 54239  | Multicopper oxidases                                     |
| 44476  | Multidrug resistance-associated protein, ABC superfamily |

67971 MYND-type Zn-finger protein  
76366 NADH:flavin oxidoreductase/12-oxophytodienoate reductase  
60352 NADH-dehydrogenase (ubiquinone)  
53079 NADP/FAD dependent oxidoreductase  
109538 nZIP (ATF2 ?)  
124097 phenazine biosynthesis PhzC/PhzF-type epimerase  
124056 phosphatidic acid phosphatase  
64959 phosphatidyl synthase  
121498 Phosphatidylserine decarboxylase  
123572 Phospholipase A2  
67579 phospholipase A2  
122824 PHT11-type GPCRs  
73618 PKS  
73621 PKS  
82327 Pleiotropic drug resistance proteins (PDR1-15), ABC superfamily  
82105 Pleiotropic drug resistance proteins (PDR1-15), ABC superfamily  
111245 polysaccharide lyase; distantly related to chondroitin lyases  
58418 Predicted unusual protein kinase  
5647 PTH11-type GPCRs  
47315 P-type ATPase  
74282 QI74 orthologue  
111053 retrograde regulation protein 2  
72137 skeleton binding protein  
59364 Sexual differentiation process protein ISP4  
106164 short chain dehydrogenase/reductase  
77202 short chain dehydrogenase/reductase  
120911 short chain dehydrogenase/reductase  
3055 short chain dehydrogenase/reductase  
23090 short chain dehydrognease/reductase  
34297 Stress responsive RCI peptide



|        |                                                                         |
|--------|-------------------------------------------------------------------------|
| 106695 | Sulfite oxidase, molybdopterin-binding component                        |
| 76601  | Sulfite oxidase, molybdopterin-binding component                        |
| 123992 | swollenin                                                               |
| 70949  | Thiamine pyrophosphate-requiring enzyme / benzoyl formate decarboxylase |
| 103034 | transcription factor 1-beta (cutinase)                                  |
| 2211   | Transketolase                                                           |
| 109276 | Tripeptidyl peptidase II                                                |
| 80654  | UDP-glucuronosyl and UDP-glucosyl transferase                           |
| 107494 | unique protein                                                          |
| 123777 | unique protein                                                          |
| 124338 | unique protein                                                          |
| 123962 | unique protein                                                          |
| 120926 | unique protein                                                          |
| 103145 | unique protein                                                          |
| 105514 | unique protein                                                          |
| 120504 | unique protein                                                          |
| 121396 | unique protein                                                          |
| 122614 | unique protein                                                          |
| 111146 | unique protein                                                          |
| 121136 | unique protein                                                          |
| 110440 | unique protein                                                          |
| 70972  | unique protein                                                          |
| 105406 | unique protein                                                          |
| 124296 | unique protein                                                          |
| 105722 | unique protein, HGT                                                     |
| 105844 | unique protein, secreted                                                |
| 74214  | unknown protein                                                         |
| 60422  | unknown protein                                                         |
| 112014 | unknown protein                                                         |
| 66092  | unknown protein, only in fungi                                          |

|        |                 |
|--------|-----------------|
| 124022 | unknown protein |
| 121416 | unknown protein |
| 68574  | unknown protein |
| 122089 | unknown protein |
| 111362 | unknown protein |
| 105287 | unknown protein |
| 109925 | unknown protein |
| 70894  | unknown protein |
| 60370  | unknown protein |
| 46764  | unknown protein |
| 104272 | unknown protein |
| 104295 | unknown protein |
| 124198 | unknown protein |
| 44967  | unknown protein |
| 60616  | unknown protein |
| 69375  | unknown protein |
| 119619 | unknown protein |
| 104174 | unknown protein |
| 60560  | unknown protein |
| 105237 | unknown protein |
| 60445  | unknown protein |
| 105455 | unknown protein |
| 109249 | unknown protein |
| 121439 | unknown protein |
| 121163 | unknown protein |
| 2033   | unknown protein |
| 123888 | unknown protein |
| 63868  | unknown protein |
| 103133 | unknown protein |
| 103031 | unknown protein |

|        |                         |
|--------|-------------------------|
| 123697 | Unknown protein         |
| 54048  | unknown protein         |
| 103576 | unknown protein         |
| 42848  | unknown protein         |
| 61526  | unknown protein         |
| 75027  | unknown protein         |
| 122792 | unknown protein         |
| 82260  | unknown protein         |
| 106686 | unknown protein         |
| 58910  | unknown protein         |
| 120623 | unknown protein         |
| 4952   | unknown protein         |
| 56853  | unknown protein         |
| 61504  | unknown protein         |
| 103060 | unknown protein         |
| 23240  | unknown protein         |
| 45598  | unknown protein         |
| 103059 | unknown protein         |
| 4851   | unknown protein         |
| 79222  | unknown protein         |
| 121486 | unknown protein         |
| 105533 | unknown protein         |
| 107853 | unknown protein         |
| 58639  | unknown protein         |
| 121653 | unknown protein         |
| 81659  | unknown protein         |
| 23228  | unknown protein Duf1479 |
| 66696  | unknown protein, Duf636 |
| 67133  | unknown protein, 1TM    |
| 69483  | unknown protein, 2 TM   |

|        |                                                     |
|--------|-----------------------------------------------------|
| 82374  | unknown protein, 3TM                                |
| 50996  | unknown protein, C2 domain                          |
| 4626   | unknown protein, C2 domain                          |
| 110891 | unknown protein, cupin region                       |
| 54761  | unknown protein, cupin region                       |
| 5359   | unknown protein, Duf1348                            |
| 60810  | unknown protein, GPR1/FUN34/yaaH protein, 6TMs      |
| 112239 | unknown protein, secreted                           |
| 33827  | unknown protein, secreted                           |
| 124282 | unknown protein, SET and MYND domain                |
| 53824  | unknown secreted protein                            |
| 44965  | zinc dependent alcohol dehydrogenase                |
| 65097  | Zinc-binding oxidoreductase                         |
| 23292  | Zinc-binding oxidoreductase                         |
| 112539 | Zn2Cys6 transcription factor                        |
| 120715 | Zn2Cys6 transcription factor                        |
| 70197  | Zn-dependent hydrolase (beta-lactamase superfamily) |

---

\*strain CPK3793 was used; sporulation-upregulated genes were those described by Metz et al. (2011)

**Supplementary Table S3.** LaeA/LAE1 protein sequences used to construct the phylogenetic tree and identify the *T. reesei* LAE1 orthologue

| <b>Fungal species</b>               | <b>Protein ID*</b> | <b>Source**</b>                                                                                               |
|-------------------------------------|--------------------|---------------------------------------------------------------------------------------------------------------|
| <i>Aspergillus fumigatus</i>        | XP_752835.1        | <a href="http://www.ncbi.nlm.nih.gov/protein">http://www.ncbi.nlm.nih.gov/protein</a>                         |
| <i>Neosartorya fischeri</i>         | XP_001264291.1     | <a href="http://www.ncbi.nlm.nih.gov/protein">http://www.ncbi.nlm.nih.gov/protein</a>                         |
| <i>Aspergillus clavatus</i>         | XP_001268793.1     | <a href="http://www.ncbi.nlm.nih.gov/protein">http://www.ncbi.nlm.nih.gov/protein</a>                         |
| <i>Aspergillus parasiticus</i>      | AAX68414.1         | <a href="http://www.ncbi.nlm.nih.gov/protein">http://www.ncbi.nlm.nih.gov/protein</a>                         |
| <i>Aspergillus flavus</i>           | AAX68412.1         | <a href="http://www.ncbi.nlm.nih.gov/protein">http://www.ncbi.nlm.nih.gov/protein</a>                         |
| <i>Aspergillus nidulans</i>         | AAQ95166.1         | <a href="http://www.ncbi.nlm.nih.gov/protein">http://www.ncbi.nlm.nih.gov/protein</a>                         |
| <i>Monascus pilosus</i>             | ABA87010.1         | <a href="http://www.ncbi.nlm.nih.gov/protein">http://www.ncbi.nlm.nih.gov/protein</a>                         |
| <i>Aspergillus niger</i>            | XP_001389674.1     | <a href="http://www.ncbi.nlm.nih.gov/protein">http://www.ncbi.nlm.nih.gov/protein</a>                         |
| <i>Aspergillus oryzae</i>           | XP_001819665.1     | <a href="http://www.ncbi.nlm.nih.gov/protein">http://www.ncbi.nlm.nih.gov/protein</a>                         |
| <i>Aspergillus terreus</i>          | XP_001210764.1     | <a href="http://www.ncbi.nlm.nih.gov/protein">http://www.ncbi.nlm.nih.gov/protein</a>                         |
| <i>Coccidioides immitis</i>         | XP_001243806.1     | <a href="http://www.ncbi.nlm.nih.gov/protein">http://www.ncbi.nlm.nih.gov/protein</a>                         |
| <i>Pyrenophora tritici-repentis</i> | XP_001934837.1     | <a href="http://www.ncbi.nlm.nih.gov/protein">http://www.ncbi.nlm.nih.gov/protein</a>                         |
| <i>Phaeosphaeria nodorum</i>        | XP_001801609.1     | <a href="http://www.ncbi.nlm.nih.gov/protein">http://www.ncbi.nlm.nih.gov/protein</a>                         |
| <i>Cochliobolus heterostrophus</i>  | 91933              | <a href="http://genome.jgi-psf.org/">http://genome.jgi-psf.org/</a>                                           |
| <i>Neurospora crassa</i>            | XP_965786          | <a href="http://www.ncbi.nlm.nih.gov/protein">http://www.ncbi.nlm.nih.gov/protein</a>                         |
| <i>Neurospora discreta</i>          | 96073              | <a href="http://genome.jgi-psf.org/">http://genome.jgi-psf.org/</a>                                           |
| <i>Neurospora tetrasperma</i>       | 38437              | <a href="http://genome.jgi-psf.org/">http://genome.jgi-psf.org/</a>                                           |
| <i>Magnaporthe grisea</i>           | MGG_01233.6        | <a href="http://www.broadinstitute.org/annotation/genome">http://www.broadinstitute.org/annotation/genome</a> |
| <i>Chaetomium globosum</i>          | CHGG_01690.1       | <a href="http://www.broadinstitute.org/annotation/genome">http://www.broadinstitute.org/annotation/genome</a> |
| <i>Fusarium graminearum</i>         | FGSG_00657.3       | <a href="http://www.broadinstitute.org/annotation/genome">http://www.broadinstitute.org/annotation/genome</a> |
| <i>Fusarium verticillioides</i>     | FVEG_00539.3       | <a href="http://www.broadinstitute.org/annotation/genome">http://www.broadinstitute.org/annotation/genome</a> |
| <i>Fusarium oxysporum</i> 1***      | FOXG_00975.2       | <a href="http://www.broadinstitute.org/annotation/genome">http://www.broadinstitute.org/annotation/genome</a> |
| <i>F. oxysporum</i> 2***            | FOXG_14806.2       | <a href="http://www.broadinstitute.org/annotation/genome">http://www.broadinstitute.org/annotation/genome</a> |
| <i>Nectria haematococca</i>         | 90349              | <a href="http://genome.jgi-psf.org/">http://genome.jgi-psf.org/</a>                                           |
| <i>Trichoderma atroviride</i>       | 42103              | <a href="http://genome.jgi-psf.org/">http://genome.jgi-psf.org/</a>                                           |
| <i>Trichoderma virens</i>           | 31676              | <a href="http://genome.jgi-psf.org/">http://genome.jgi-psf.org/</a>                                           |

*Trichoderma reesei*

41617

<http://genome.jgi-psf.org/>

\* protein IDs are preferentially given as those used in the NCBI database; when proteins are only present in genome databases, the respective protein ID used there is given

\*\* wherever possible, the NCBI database was given priority; otherwise the respective genome databases are given

\*\*\* *F. oxysporum* contains 2 paralogues of LAE1, neither of which could be excluded and therefore both of them were used in the phylogenetic tree

#### Supplementary Table S4. Oligonucleotide primers used in this study

---

| Name                          | *Sequence (5'-3')                    |
|-------------------------------|--------------------------------------|
| <i>lae1 gene deletion</i>     |                                      |
| 5Trlae1Hind                   | TAAGCTTCACTCGCTTGTGTCTTC             |
| 5Trlae1Xho                    | TCTCGAGCGTTTATAGTGAGTAATGGC          |
| 3Trlae1Xho                    | TCTCGAGCTATTGCACTCTGTAAGCC           |
| 3Trlae1Apa                    | TGGGCCCTGGGTAGTGTTTCGTAATG           |
| <i>tef1-lae1 construction</i> |                                      |
| tef1Xhofw                     | GCCTCGAGGGACAGAATGTAC                |
| ClaSalrv                      | AGTCGACATCGATGACGGTTTGTGTGATGTAGCGTG |
| TrLae1ATGCl                   | GCTATCGATGTCTCGAAACGCTCCCAAC         |
| TrLae1TermHind                | CGAAGCTTGCCCAAGGCATCTTTCATTG         |
| <i>cDNA amplification</i>     |                                      |
| LAE1ATG                       | GCCATGTCTCGAAACGCTC                  |
| LAE1stop                      | GCTTACAGAGTGCAATAGGC                 |

\*Respective restriction sites are underlined

**Supplementary Table S5. Primers for cellulase and *lae1* transcript quantification by Real Time PCR**

| Gene                | Forward Primer (5' to 3') | Reverse Primer (5' to 3') |
|---------------------|---------------------------|---------------------------|
| <i>tef1</i> *       | CCACATTGCCTGCAAGTTCGC     | GTCGGTGAAAGCCTCAACGCAC    |
| <i>cel7a (cbh1)</i> | CCGAGCTTGGTAGTACTCTG      | GGTAGCCTTCTTGAAGTACTGAGT  |
| <i>cel6a (cbh2)</i> | ACTACAACGGGTGGAACATTAC    | CGTGGATGTACAGCTTCTCG      |
| <i>lae1</i>         | ACTGGAGATTGACTGGATGC      | TTCTGCGTCTGGTAGCCTC       |

\* *tef1* was used as a reference gene
